# Supplementary figures and images for: The Relation between Recombination Rate and Patterns of Molecular Evolution and Variation in Drosophila melanogaster
Source: PubMed Central journal article supplement — Mol Biol Evol. 2014 Jan 30;31(4):1010–28. doi: 10.1093/molbev/msu056 (PMC3969569; doi:10.1093/molbev/msu056), 2014-01-30

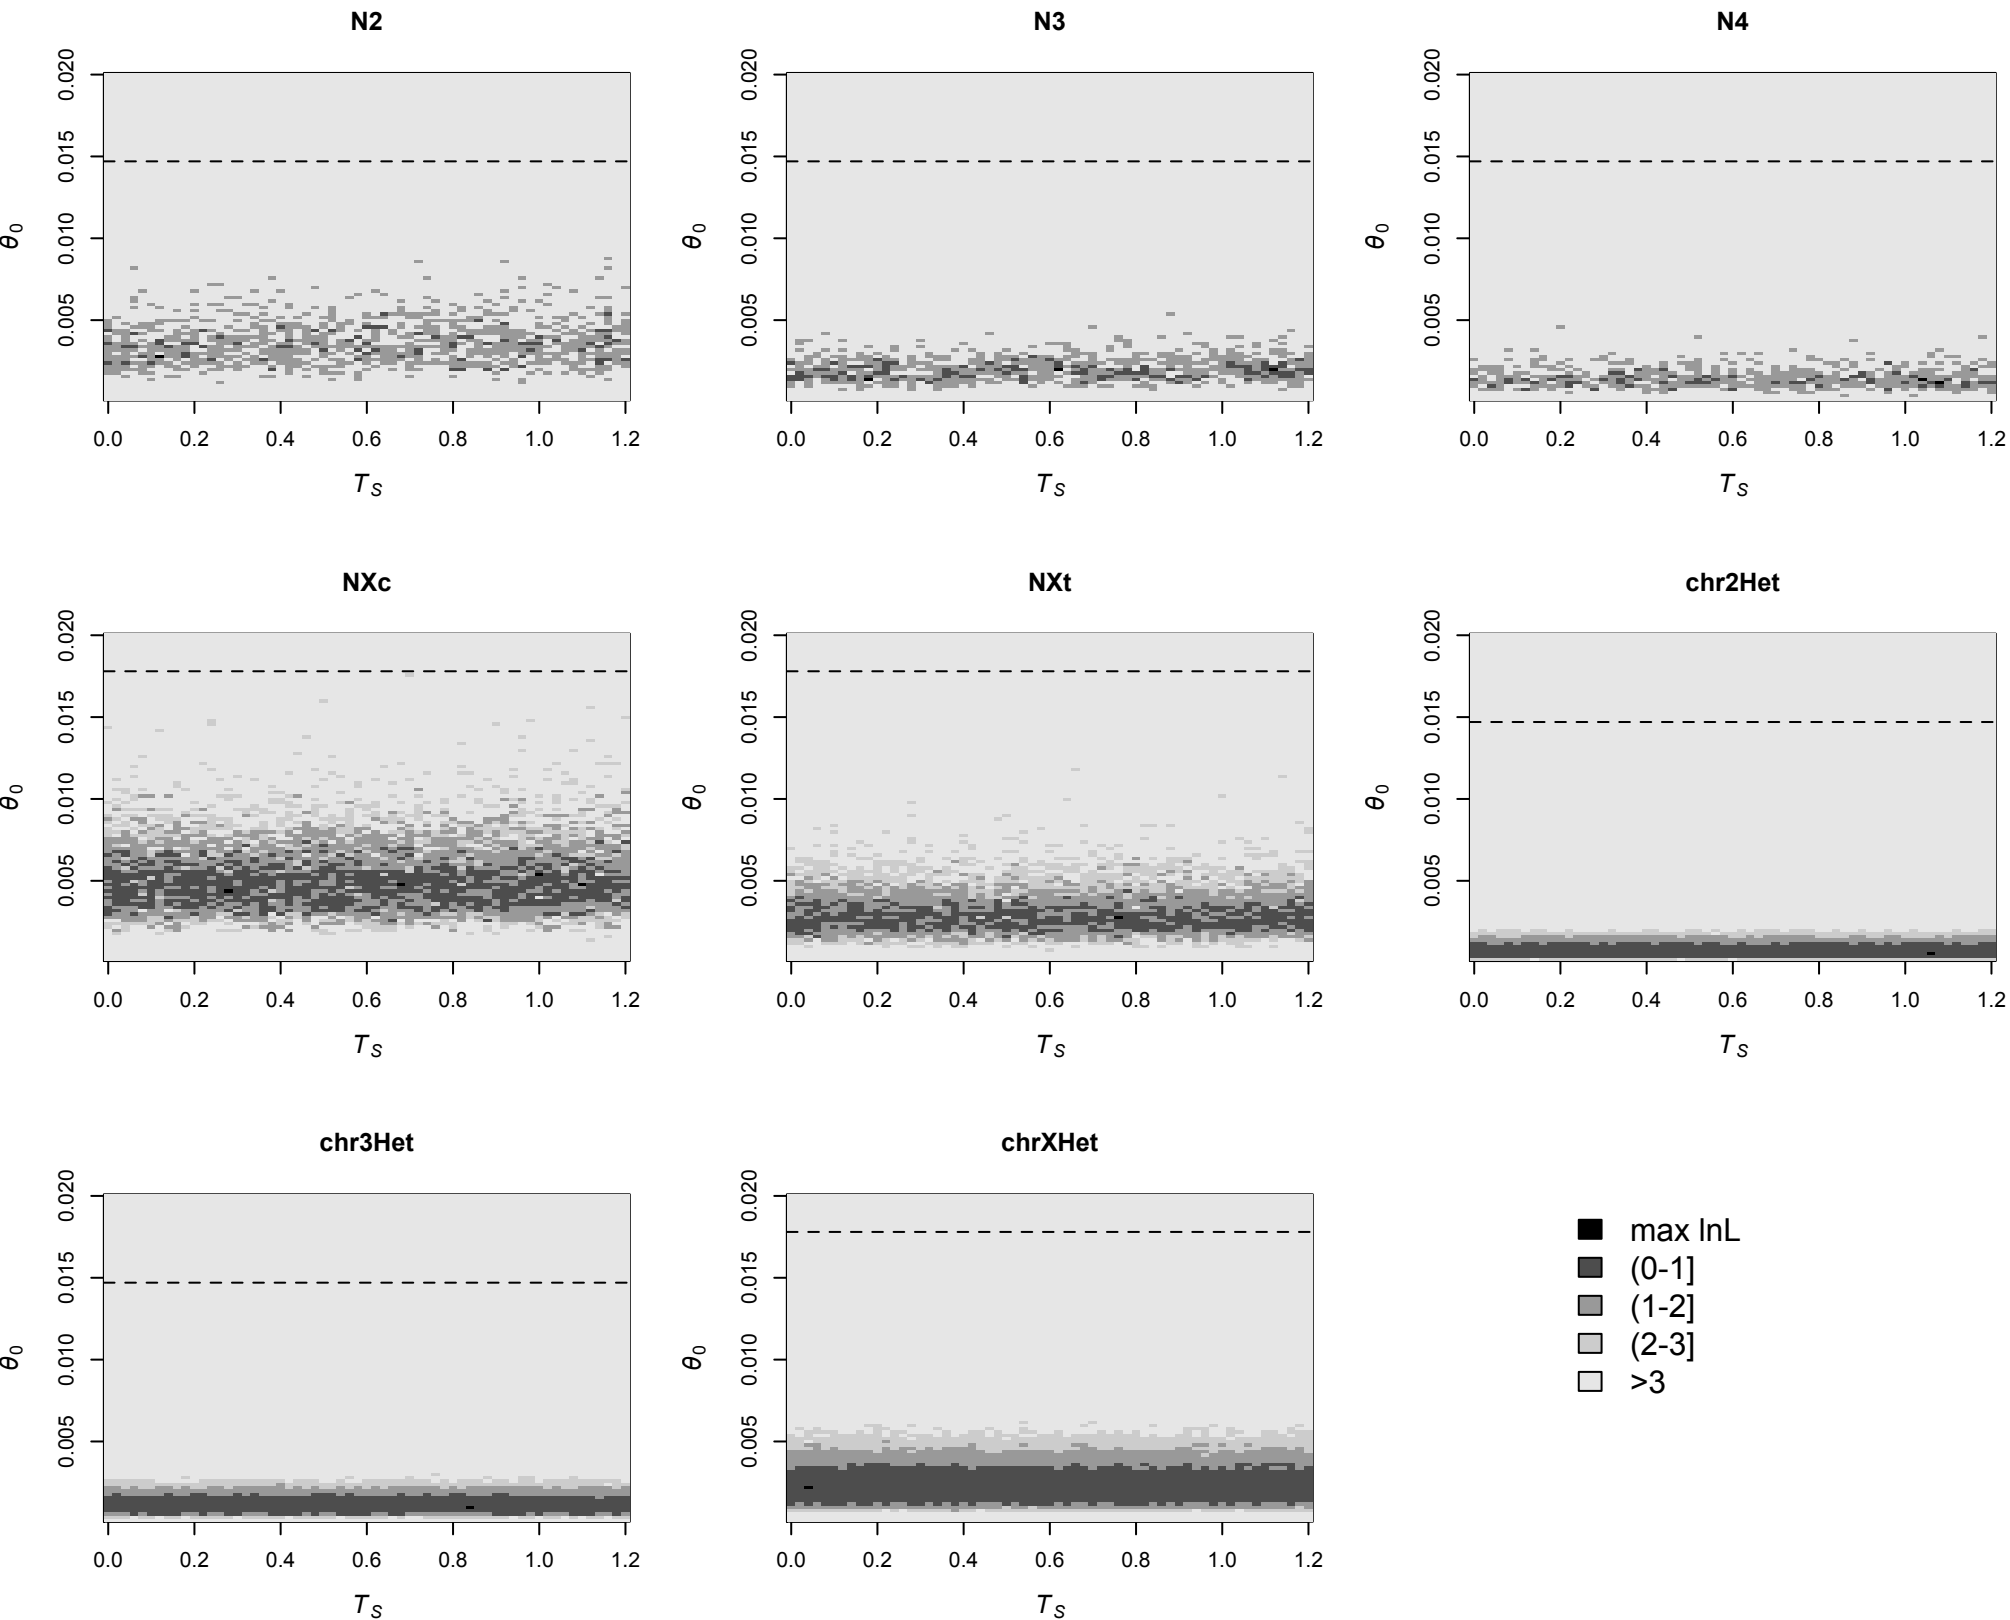

Supplement: supp_msu056_Supplementary_Material-2.pdf [file supp_msu056_Supplementary_Material-2.pdf]
